# Supplementary material
Source: PubMed Central journal article supplement (PMC7045797)
Supplement: ao0c00136_si_001.pdf [file ao0c00136_si_001.pdf]

## **Supporting information**

Self-assemblies of Zinc-complexes for Aggregation Induced Emission Luminogen Precursors

Rinki Brahma, Jubaraj B. Baruah\*

Department of Chemistry, Indian Institute of Technology Guwahati, Guwahati -781 039,  
Assam, India. Email: [juba@iitg.ac.in](mailto:juba@iitg.ac.in)

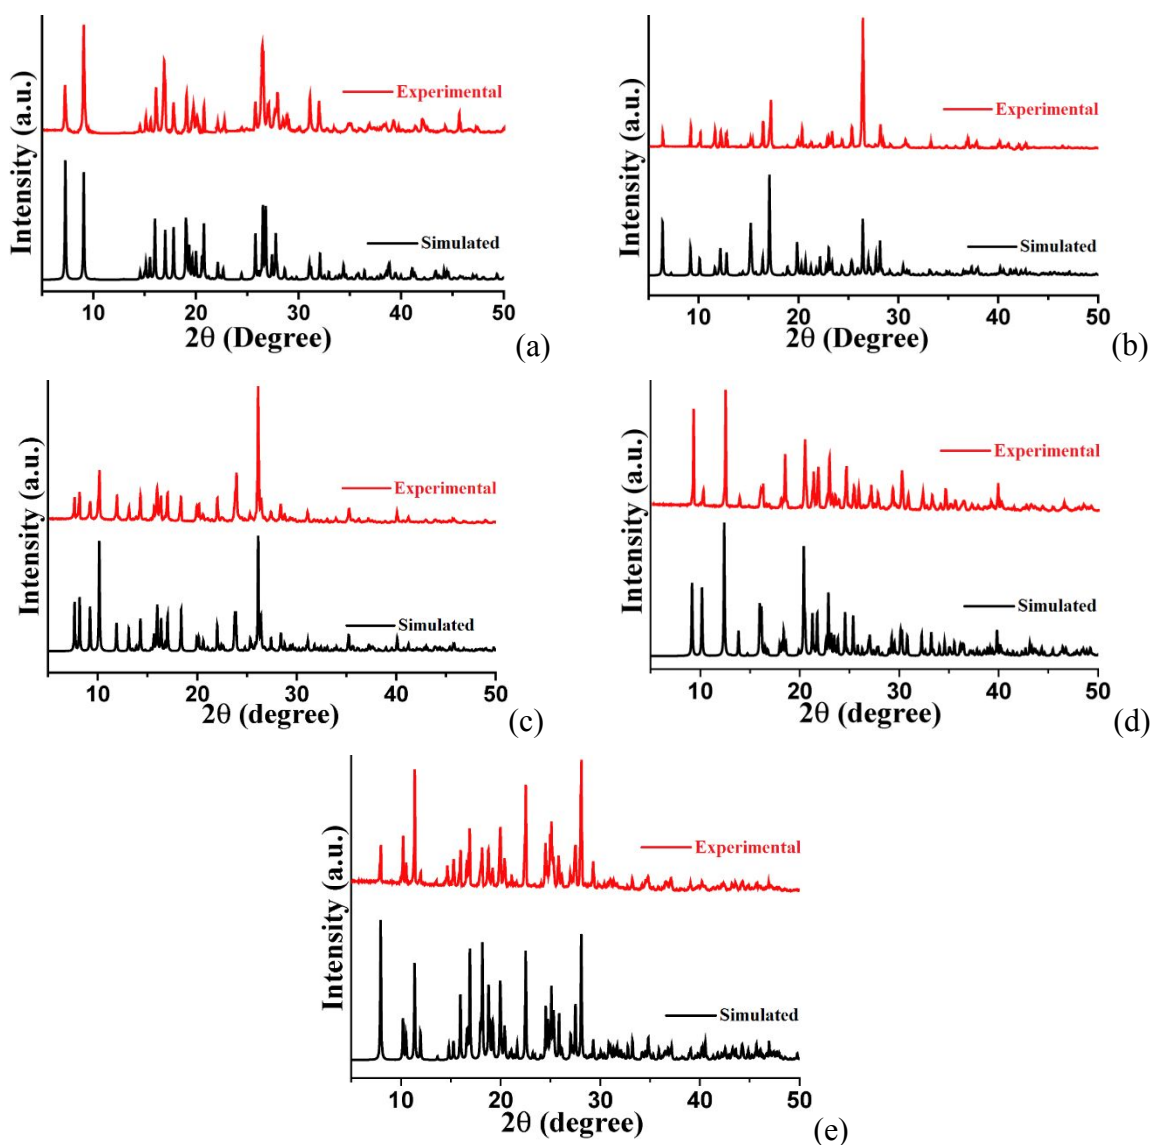

Figure S1: PXRD patterns of (a) Complex 1; (b) Complex 2; (c) Complex 3; (d) Complex 4 (e) Complex 5 and simulated patterns generated from CIF file (Red = Experimental, Black = Simulated).

### Quantum yield calculation of aggregation induced emission in solution:

The quantum yield of fluorescence was determined by using quinine sulphate as a reference in DMSO at room temperature.

*Quantum Yield*

$$= \frac{\text{Area of the complex}}{\text{Area of Quinine Sulphate}} \times \frac{\text{Absorbance at 333nm (Quinine Sulphate)}}{\text{Absorbance at 333nm (Complex)}} \times \frac{\eta^2}{\eta_R^2} \times Q_R$$

where,  $\eta$  = Refractive Index of solvent used of sample preparation

$\eta_R$  = Refractive Index of solvent used of reference preparation

$Q_R$  = Quantum yield of reference

**Crystallographic Study:** X-ray single crystal diffraction data of the complexes **1** and **2** were collected on an Oxford SuperNova diffractometer whereas for the complexes **3**, **4** and **5** were collected by using a Bruker Nonius SMART APEX CCD diffractometer equipped with a graphite monochromator. The data were collected at 296 K with Mo K $\alpha$  radiation ( $\lambda = 0.71073$  Å). Data reduction and cell refinement were carried out by CrysAlisPro software. Structures were solved using SHELXS-14 by direct method and refined by full-matrix least-squares on  $F^2$  using SHELXL-14. All non-hydrogen atoms were refined in anisotropic approximation against  $F^2$  of all reflections. Hydrogen atoms were placed at their geometric positions by riding and refined in the isotropic approximation. The crystallographic parameters are listed in table 1S. (Reference : Sheldrick GM. ActaCrystallogr. C Struct. Chem. **2015**, *71*, 3 - 8.)

**Table S1:** Crystallographic parameters of the complexes **1-5**

| Parameters                           | Complex 1                                                         | Complex 2                                                         | Complex 3                                                                      | Complex 4                                                         | Complex 5                                                         |
|--------------------------------------|-------------------------------------------------------------------|-------------------------------------------------------------------|--------------------------------------------------------------------------------|-------------------------------------------------------------------|-------------------------------------------------------------------|
| Formula                              | C <sub>28</sub> H <sub>28</sub> N <sub>6</sub> O <sub>12</sub> Zn | C <sub>26</sub> H <sub>22</sub> N <sub>6</sub> O <sub>11</sub> Zn | C <sub>42</sub> H <sub>36</sub> N <sub>8</sub> O <sub>20</sub> Zn <sub>2</sub> | C <sub>26</sub> H <sub>28</sub> N <sub>6</sub> O <sub>14</sub> Zn | C <sub>20</sub> H <sub>20</sub> N <sub>4</sub> O <sub>12</sub> Zn |
| CCDC                                 | 1964042                                                           | 1964041                                                           | 1964043                                                                        | 1964039                                                           | 1964040                                                           |
| Mol.wt.                              | 705.93                                                            | 659.86                                                            | 1103.53                                                                        | 713.91                                                            | 573.77                                                            |
| Space group                          | C 2/c                                                             | P -1                                                              | C 2/c                                                                          | P 2 <sub>1</sub> /n                                               | P -1                                                              |
| a (Å)                                | 20.1428(11)                                                       | 8.0671(6)                                                         | 22.0343(8)                                                                     | 7.8574(4)                                                         | 5.9866(7)                                                         |
| b (Å)                                | 6.2816(3)                                                         | 12.718(2)                                                         | 13.6328(5)                                                                     | 19.2849(9)                                                        | 8.7293(10)                                                        |
| c (Å)                                | 25.1031(13)                                                       | 14.3069(18)                                                       | 15.1548(6)                                                                     | 9.9755(5)                                                         | 22.354(3)                                                         |
| $\alpha$ (°)                         | 90                                                                | 81.172(13)                                                        | 90                                                                             | 90                                                                | 96.624(3)                                                         |
| $\beta$ (°)                          | 104.399(5)                                                        | 76.060(9)                                                         | 100.7150(10)                                                                   | 102.3550(10)                                                      | 90.797(4)                                                         |
| $\gamma$ (°)                         | 90                                                                | 74.624(12)                                                        | 90                                                                             | 90                                                                | 90.264(3)                                                         |
| V (Å <sup>3</sup> )                  | 3076.5(3)                                                         | 1367.3(3)                                                         | 4473.0(3)                                                                      | 1476.57(13)                                                       | 1160.2(2)                                                         |
| Density, g cm <sup>-3</sup>          | 1.524                                                             | 1.603                                                             | 1.639                                                                          | 1.606                                                             | 1.642                                                             |
| Abs. coeff., mm <sup>-1</sup>        | 0.872                                                             | 0.972                                                             | 1.165                                                                          | 0.914                                                             | 1.133                                                             |
| F (000)                              | 1456                                                              | 676                                                               | 2256                                                                           | 736                                                               | 588                                                               |
| Total no. of reflections             | 2736                                                              | 4830                                                              | 3966                                                                           | 2617                                                              | 4117                                                              |
| Reflections, I > 2 $\sigma$ (I)      | 2221                                                              | 3589                                                              | 3065                                                                           | 2299                                                              | 3653                                                              |
| Max. $\theta$ /°                     | 25.049                                                            | 25.044                                                            | 25.044                                                                         | 25.047                                                            | 25.050                                                            |
| Ranges (h, k, l)                     | -23 ≤ h ≤ 15<br>-6 ≤ k ≤ 7<br>-23 ≤ l ≤ 29                        | -9 ≤ h ≤ 9<br>-10 ≤ k ≤ 15<br>-17 ≤ l ≤ 15                        | -26 ≤ h ≤ 26<br>-16 ≤ k ≤ 16<br>-18 ≤ l ≤ 18                                   | -9 ≤ h ≤ 9<br>-22 ≤ k ≤ 22<br>-11 ≤ l ≤ 11                        | -7 ≤ h ≤ 7<br>-10 ≤ k ≤ 10<br>-26 ≤ l ≤ 26                        |
| Complete to 2 $\theta$ (%)           | 99.9                                                              | 99.9                                                              | 100                                                                            | 100                                                               | 100                                                               |
| Data/restraints/parameters           | 2736/0/223                                                        | 4830/2/413                                                        | 3966/2/338                                                                     | 2617/4/227                                                        | 4117/2/357                                                        |
| Goof (F <sup>2</sup> )               | 1.038                                                             | 1.007                                                             | 1.040                                                                          | 1.025                                                             | 1.012                                                             |
| R indices [I > 2 $\sigma$ (I)]       | 0.0406                                                            | 0.0523                                                            | 0.0318                                                                         | 0.0256                                                            | 0.0544                                                            |
| wR <sub>2</sub> [I > 2 $\sigma$ (I)] | 0.0788                                                            | 0.0992                                                            | 0.0877                                                                         | 0.0503                                                            | 0.1793                                                            |
| R indices (all data)                 | 0.0552                                                            | 0.0755                                                            | 0.0469                                                                         | 0.0311                                                            | 0.0623                                                            |
| wR <sub>2</sub> (all data)           | 0.0861                                                            | 0.1178                                                            | 0.0979                                                                         | 0.0528                                                            | 0.1902                                                            |

**Table S2:** Solid state fluorescence emissions  $\lambda_{\text{ex}}$  (350 nm) and quantum yield of metal complexes **1-5**.

| Complexes        | $\lambda_{\text{em}}$ (nm) | Quantum yield (%) |
|------------------|----------------------------|-------------------|
| Complex <b>1</b> | 434, 463                   | 1.48              |
| Complex <b>2</b> | 437                        | 4.14              |
| Complex <b>3</b> | 438, 463                   | 2.61              |
| Complex <b>4</b> | 439                        | 13.56             |
| Complex <b>5</b> | 448                        | 0.56              |

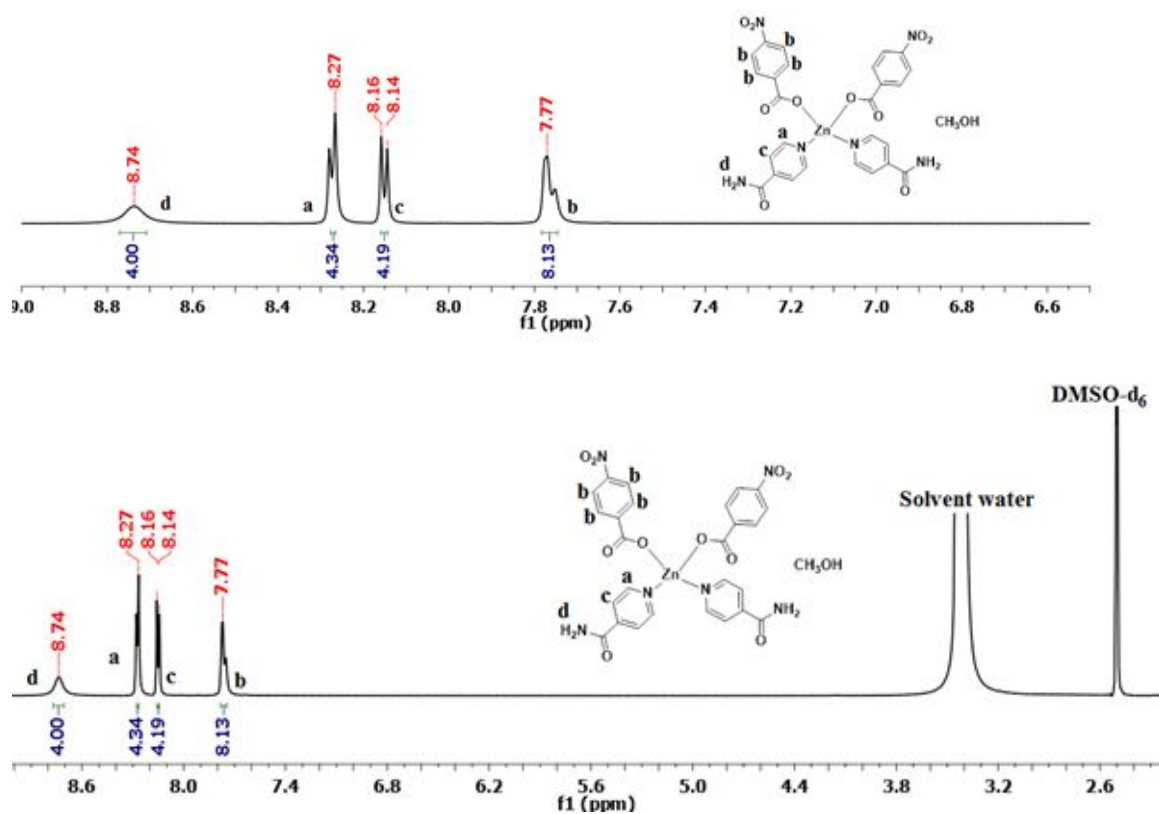

**Figure S2:** <sup>1</sup>H-NMR (600 MHz, DMSO-d<sub>6</sub>) spectra of complex **1** (top: expansion of aromatic region).

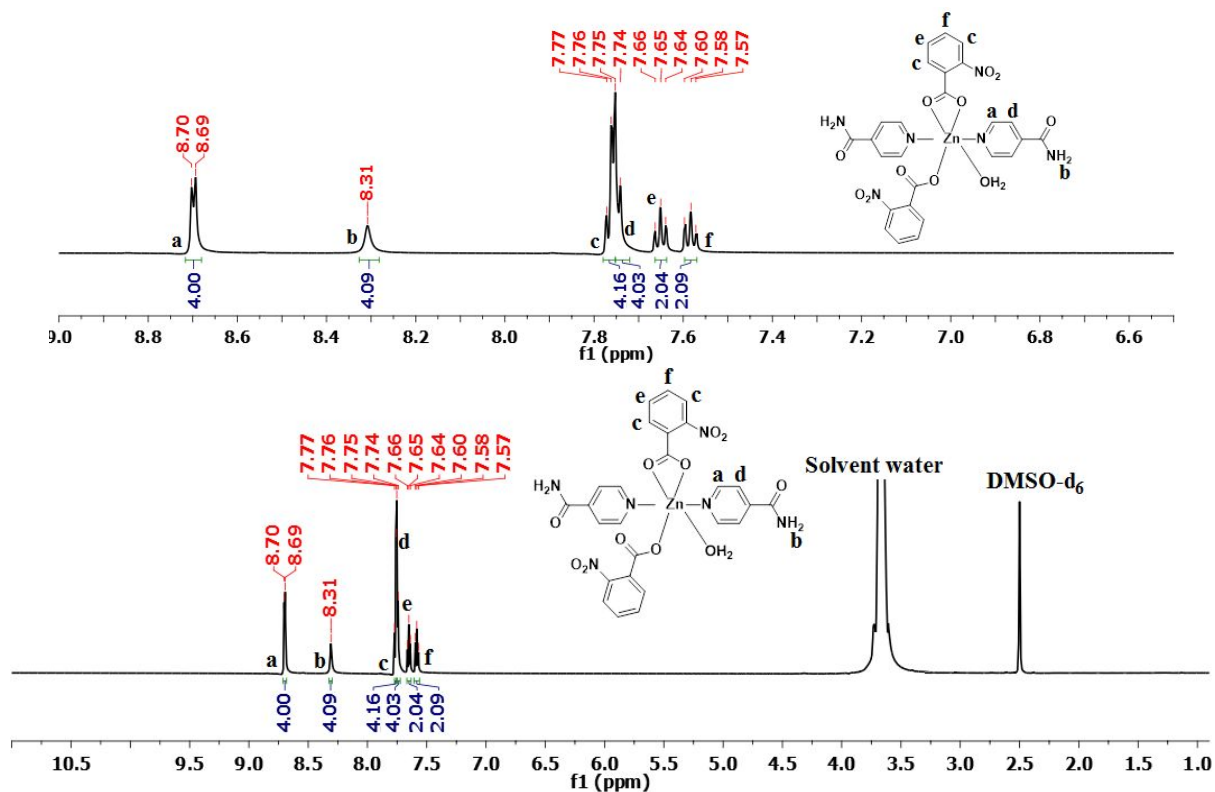

Figure S3:  $^1\text{H-NMR}$  (600 MHz,  $\text{DMSO-d}_6$ ) spectra of complex **2** (top: expansion of aromatic region).

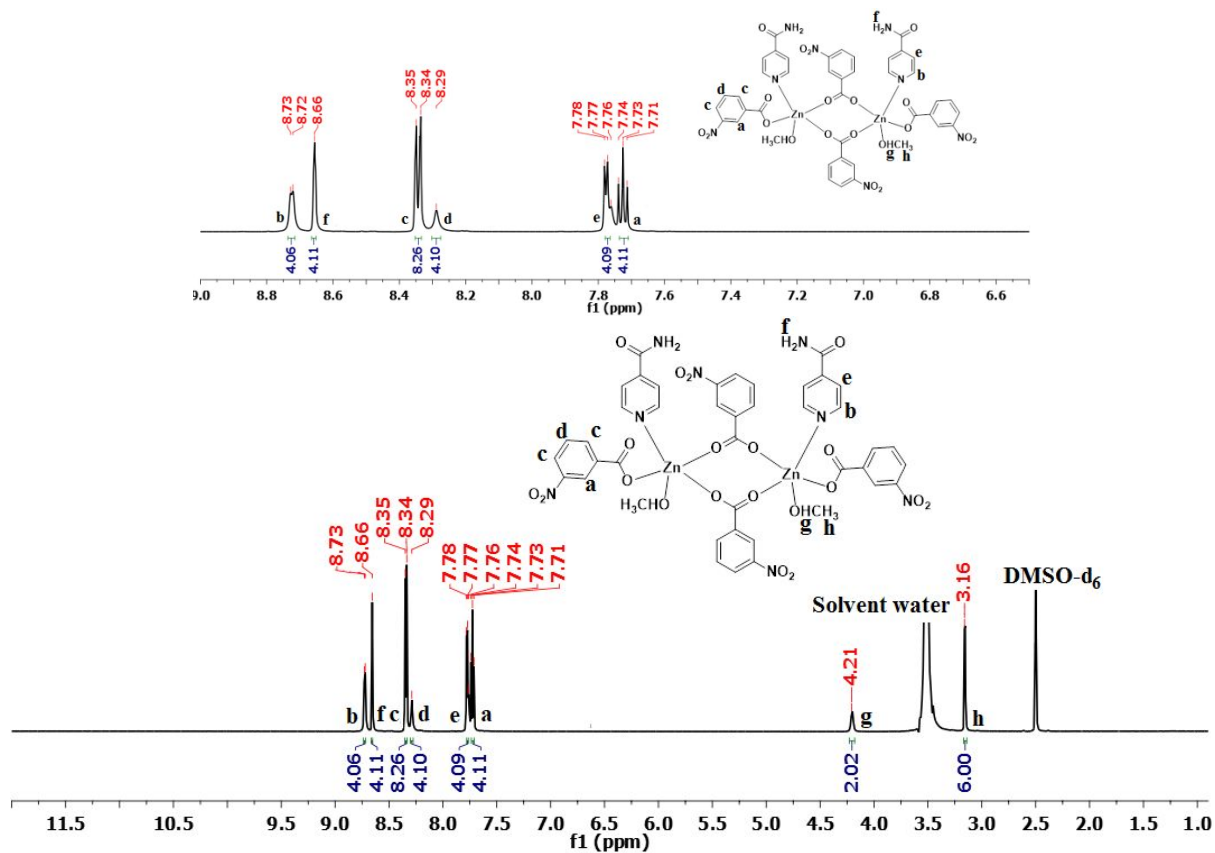

Figure S4:  $^1\text{H-NMR}$  (600 MHz,  $\text{DMSO-d}_6$ ) spectra of complex **3**. (top: expansion of aromatic region).

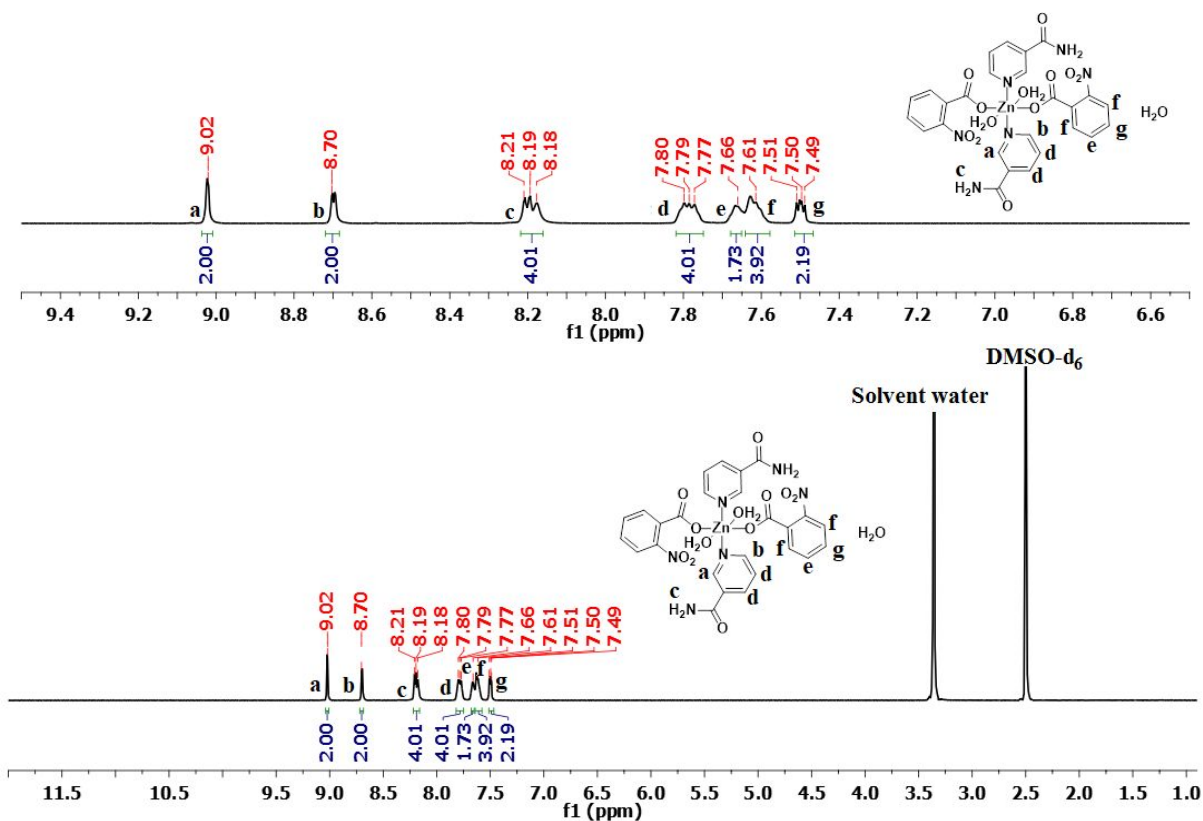

Figure S5:  $^1\text{H-NMR}$  (600 MHz,  $\text{DMSO-d}_6$ ) spectra of complex **4**. (top: expansion of aromatic region).

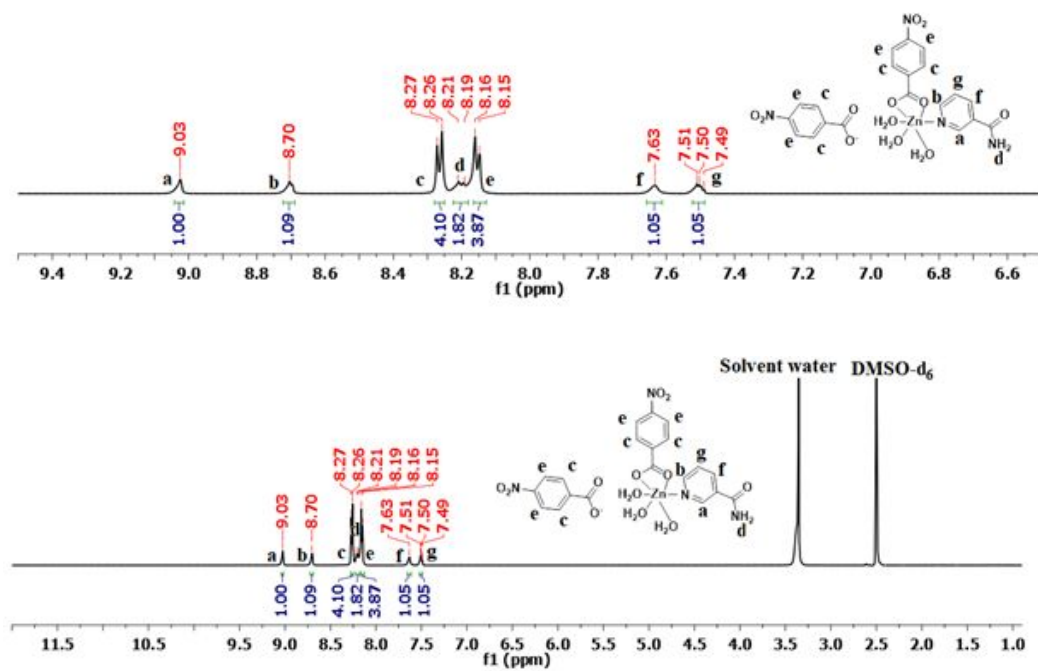

Figure S6:  $^1\text{H-NMR}$  (600 MHz,  $\text{DMSO-d}_6$ ) spectra of complex **5** (top: expansion of aromatic region).

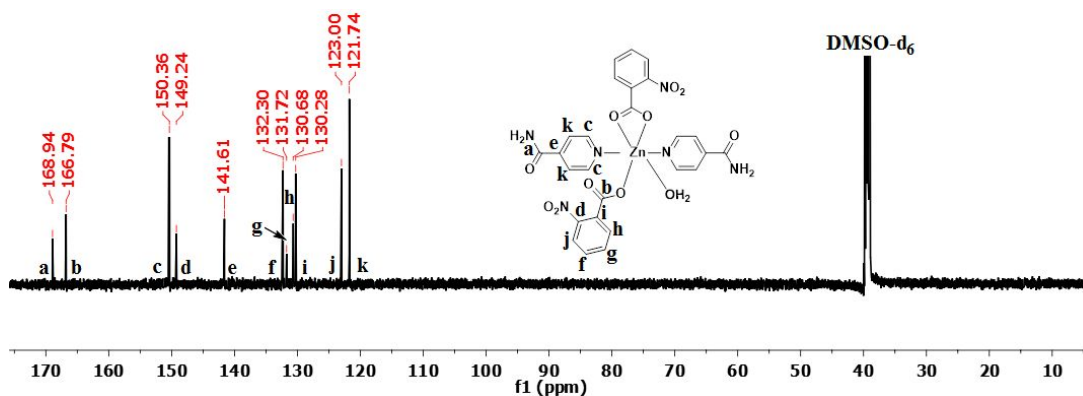

Figure S7:  $^{13}\text{C}$ -NMR (100 MHz,  $\text{DMSO-d}_6$ ) spectra of complex 2.

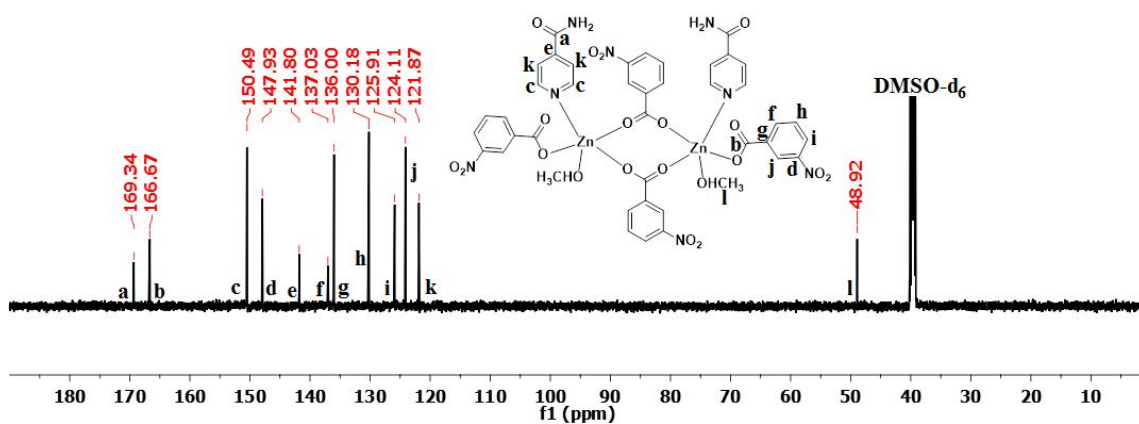

Figure S8:  $^{13}\text{C}$ -NMR (100 MHz,  $\text{DMSO-d}_6$ ) spectra of complex 3.

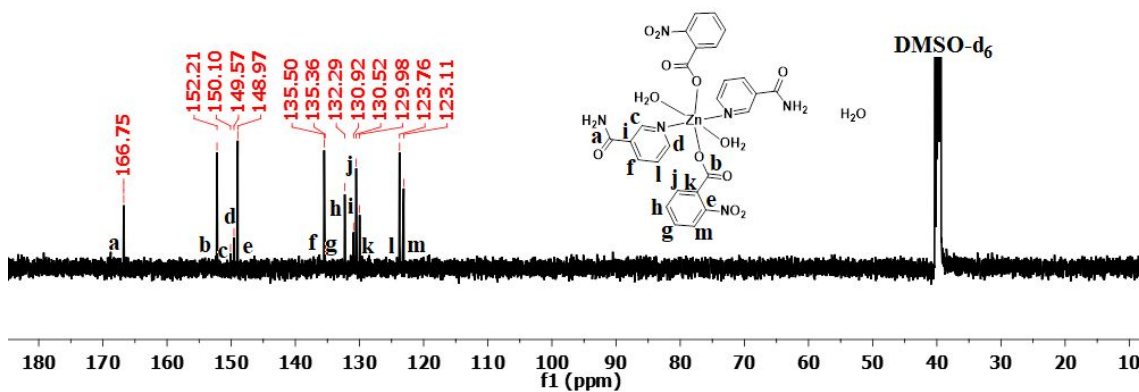

Figure S9:  $^{13}\text{C}$ -NMR (100 MHz,  $\text{DMSO-d}_6$ ) spectra of complex 4.

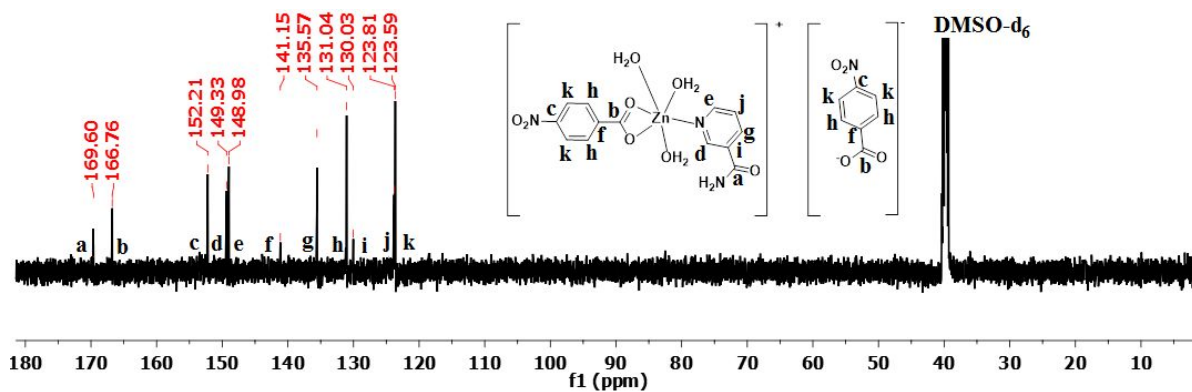

Figure S10:  $^{13}\text{C}$ -NMR (100 MHz,  $\text{DMSO-d}_6$ ) spectra of complex **5**.

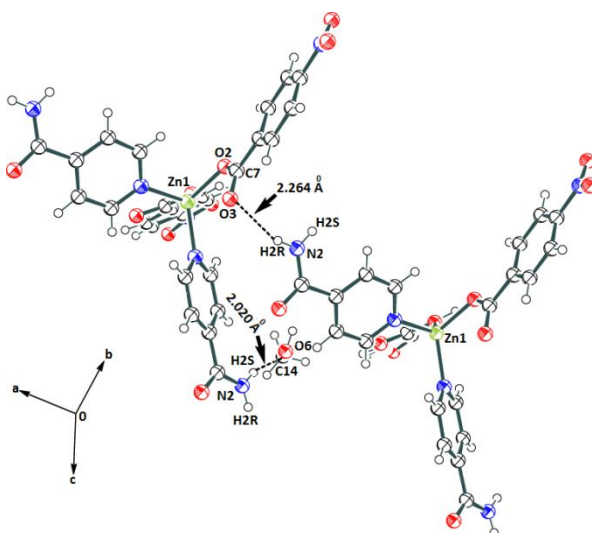

Figure S11: Hydrogen-bonded self-assembly of complex **1**.

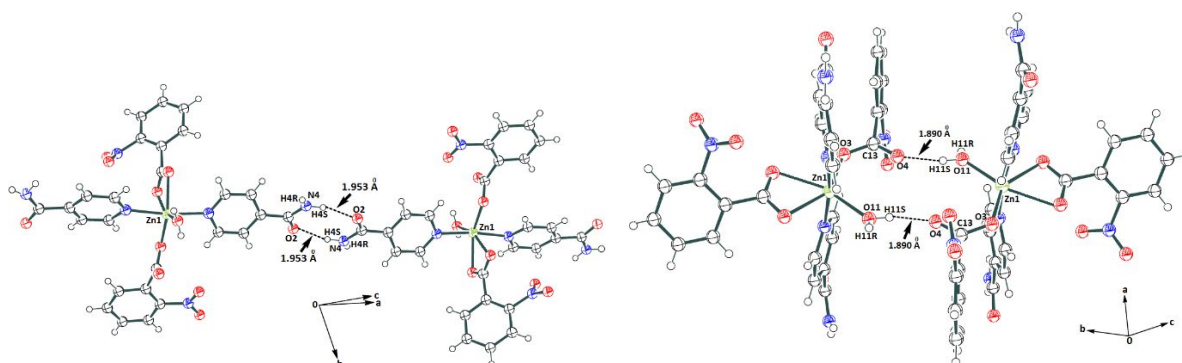

Figure S12: Hydrogen-bonded self-assembly of complex **2**.



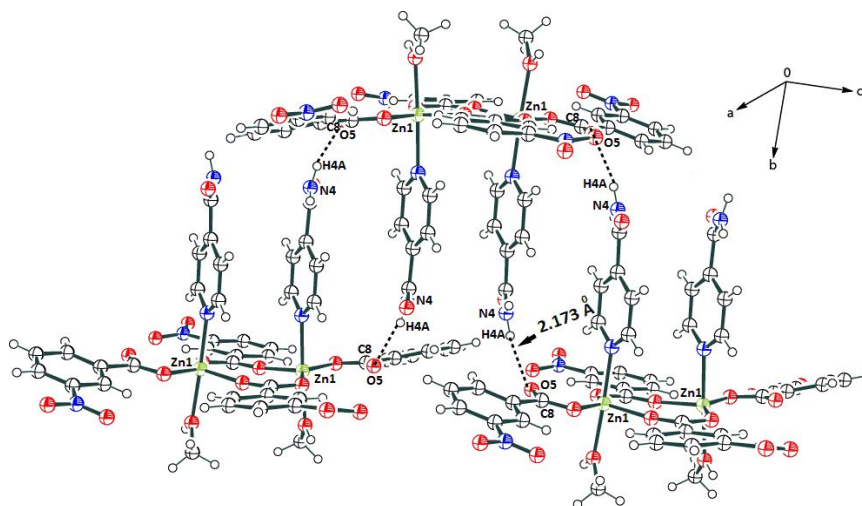

Figure S13: Hydrogen-bonded self-assembly of complex **3**.

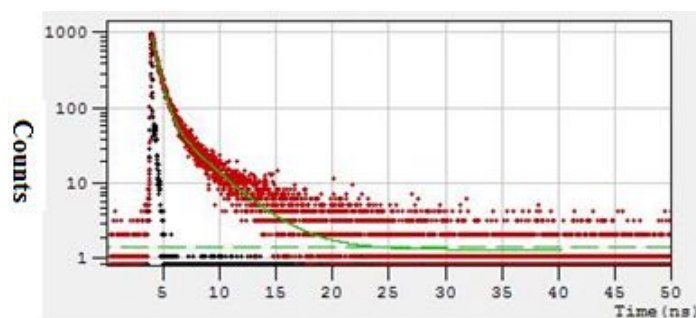

Goodness of fit  $\chi^2$ : 1.002

|   | $B_i$    | $\Delta B_i$ | $f_i$ (%) | $\Delta f_i$ (%) | $\tau_i$ (ns) | $\Delta \tau_i$ (ns) |
|---|----------|--------------|-----------|------------------|---------------|----------------------|
| 1 | 829.5481 | 4.5726       | 62.131    | 1.951            | 0.558         | 0.014                |
| 2 | 93.3513  | 2.2231       | 37.869    | 0.963            | 3.025         | 0.005                |

Figure S14: Time resolved fluorescence emission of solid sample of the complex **1** ( $\lambda_{\text{ex}} = 375$  nm,  $\lambda_{\text{em}} = 434$  nm).

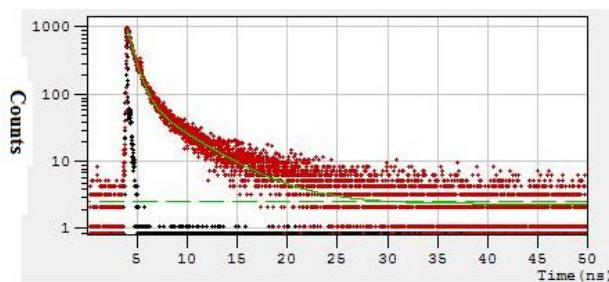

Goodness of fit  $\chi^2$ : 1.314

|   | $B_i$    | $\Delta B_i$ | $f_i$ (%) | $\Delta f_i$ (%) | $\tau_i$ (ns) | $\Delta \tau_i$ (ns) |
|---|----------|--------------|-----------|------------------|---------------|----------------------|
| 1 | 834.0839 | 4.7036       | 59.178    | 1.239            | 0.727         | 0.011                |
| 2 | 97.2193  | 2.0364       | 40.822    | 0.885            | 4.302         | 0.003                |

Figure S15: Time resolved fluorescence emission of solid sample of complex **1** ( $\lambda_{\text{ex}} = 375$  nm,  $\lambda_{\text{em}} = 463$  nm).

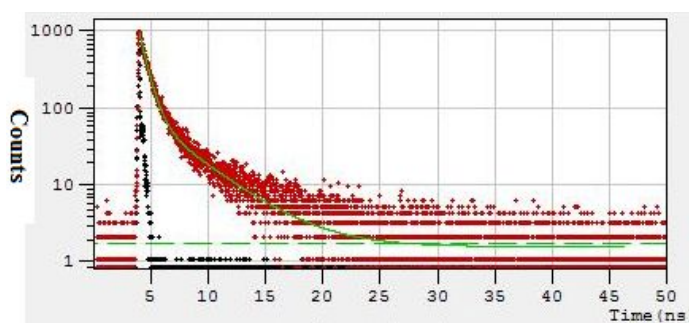

Goodness of fit  $\chi^2$ : 1.038

|   | $B_i$    | $\Delta B_i$ | $f_i$ (%) | $\Delta f_i$ (%) | $\tau_i$ (ns) | $\Delta \tau_i$ (ns) |
|---|----------|--------------|-----------|------------------|---------------|----------------------|
| 1 | 902.3928 | 4.3080       | 64.761    | 1.338            | 0.647         | 0.010                |
| 2 | 83.8453  | 1.7873       | 35.239    | 0.785            | 3.788         | 0.004                |

Figure S16: Time resolved fluorescence emission of solid sample of complex **2** ( $\lambda_{\text{ex}} = 375$  nm,  $\lambda_{\text{em}} = 437$  nm).

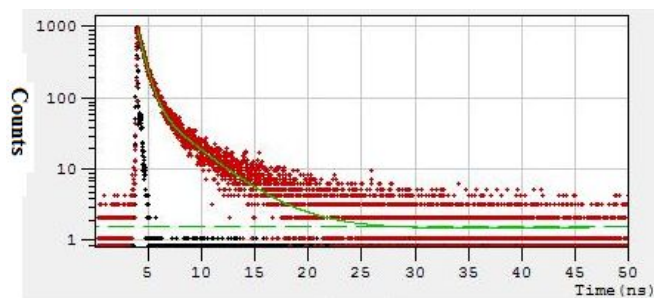

Goodness of fit  $\chi^2$ : 1.041

|   | $B_i$    | $\Delta B_i$ | $f_i$ (%) | $\Delta f_i$ (%) | $\tau_i$ (ns) | $\Delta \tau_i$ (ns) |
|---|----------|--------------|-----------|------------------|---------------|----------------------|
| 1 | 847.6031 | 4.2602       | 61.732    | 1.405            | 0.641         | 0.011                |
| 2 | 94.7730  | 2.0011       | 38.268    | 0.848            | 3.554         | 0.004                |

**Figure S17:** Time resolved fluorescence emission of solid sample of complex **3** ( $\lambda_{\text{ex}}=375$  nm,  $\lambda_{\text{em}}=438$  nm).

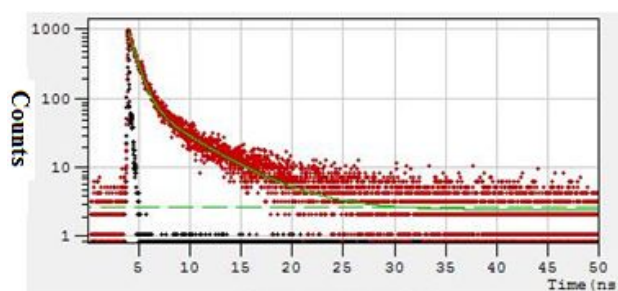

Goodness of fit  $\chi^2$ : 1.364

|   | $B_i$    | $\Delta B_i$ | $f_i$ (%) | $\Delta f_i$ (%) | $\tau_i$ (ns) | $\Delta \tau_i$ (ns) |
|---|----------|--------------|-----------|------------------|---------------|----------------------|
| 1 | 803.3154 | 4.5451       | 58.256    | 1.126            | 0.775         | 0.011                |
| 2 | 98.0222  | 2.0397       | 41.744    | 0.896            | 4.553         | 0.003                |

**Figure S18:** Time resolved fluorescence emission of solid sample of complex **3** ( $\lambda_{\text{ex}}=375$  nm,  $\lambda_{\text{em}}=463$  nm).

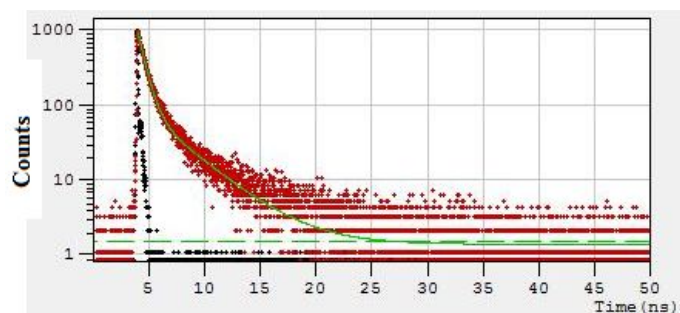

Goodness of fit  $\chi^2$ : 1.025

|   | $B_i$    | $\Delta B_i$ | $f_i$ (%) | $\Delta f_i$ (%) | $\tau_i$ (ns) | $\Delta \tau_i$ (ns) |
|---|----------|--------------|-----------|------------------|---------------|----------------------|
| 1 | 861.7091 | 4.3212       | 61.555    | 1.493            | 0.607         | 0.012                |
| 2 | 93.2296  | 1.8667       | 38.445    | 0.809            | 3.506         | 0.004                |

Figure S19: Time resolved fluorescence emission of solid sample of complex 4 ( $\lambda_{ex} = 375$  nm,  $\lambda_{em} = 439$  nm).

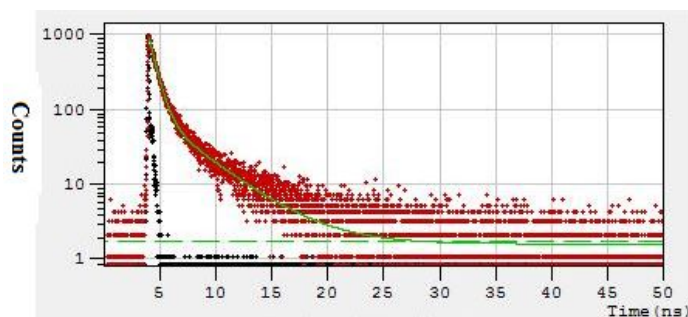

Goodness of fit  $\chi^2$ : 1.093

|   | $B_i$    | $\Delta B_i$ | $f_i$ (%) | $\Delta f_i$ (%) | $\tau_i$ (ns) | $\Delta \tau_i$ (ns) |
|---|----------|--------------|-----------|------------------|---------------|----------------------|
| 1 | 826.3301 | 4.1895       | 60.990    | 1.398            | 0.631         | 0.011                |
| 2 | 88.2730  | 1.7334       | 39.010    | 0.801            | 3.780         | 0.003                |

Figure S20: Time resolved fluorescence emission of solid-sample of complex 5 ( $\lambda_{ex} = 375$  nm,  $\lambda_{em} = 448$  nm).

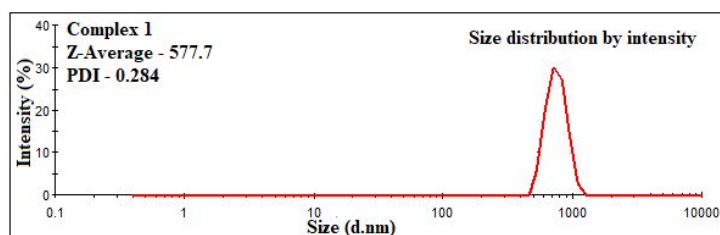

(a)

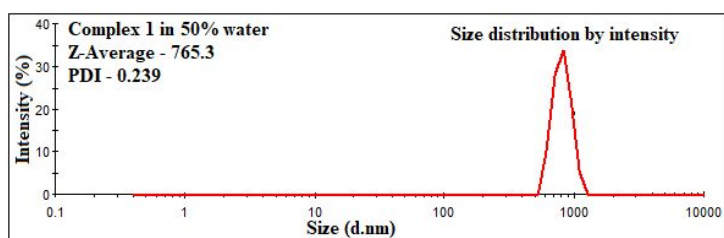

(b)

Figure S21: Plot of intensity vs size from dynamic light-scattering of complex 1 ( $10^{-4}$ M) (a) in DMSO and (b) in DMSO with 50% water.

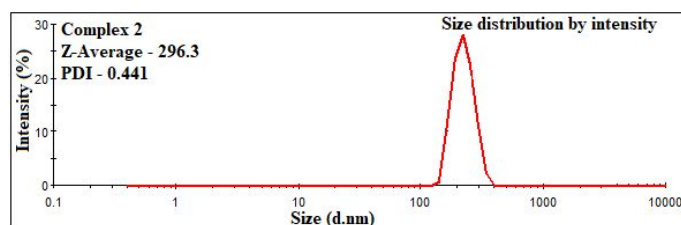

(a)

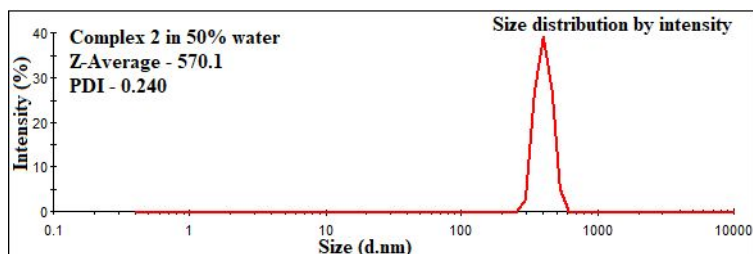

(b)

Figure S22: Plot of intensity vs size from dynamic light-scattering of the complex 2 ( $10^{-4}$ M) (a) in DMSO and (b) in DMSO with 50% water.

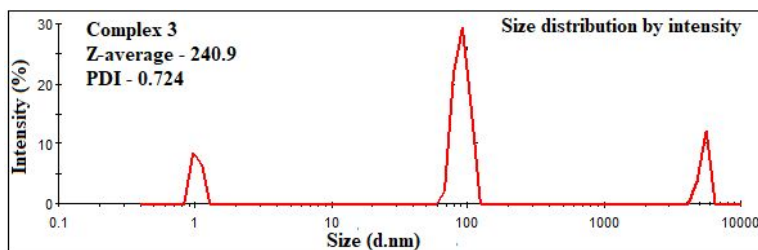

(a)

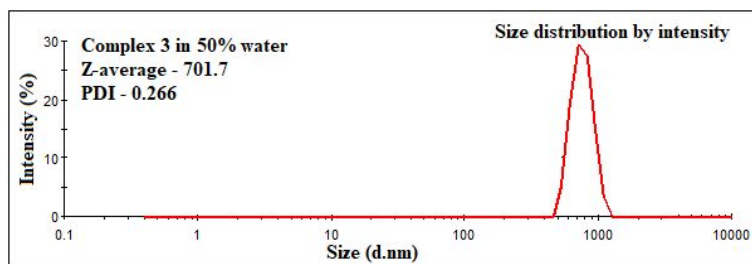

(b)

Figure S23: Plot of intensity vs size from dynamic light-scattering of complex **3** ( $10^{-4}\text{M}$ ) (a) in DMSO and (b) in DMSO with 50% water.

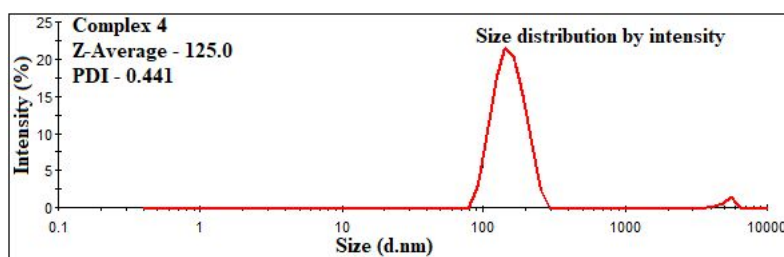

(a)

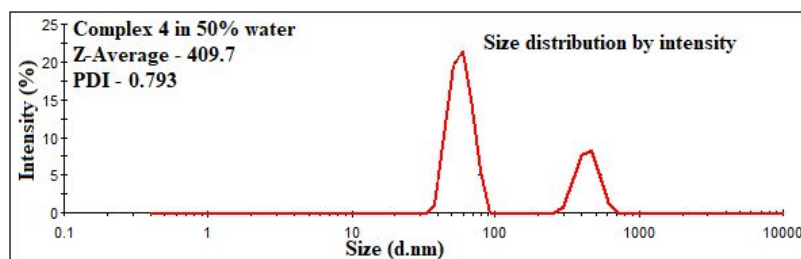

(b)

Figure S24: Plots of intensity vs size from dynamic light-scattering of complex **4** ( $10^{-4}\text{M}$ ) (a) in DMSO and (b) in DMSO with 50% water.

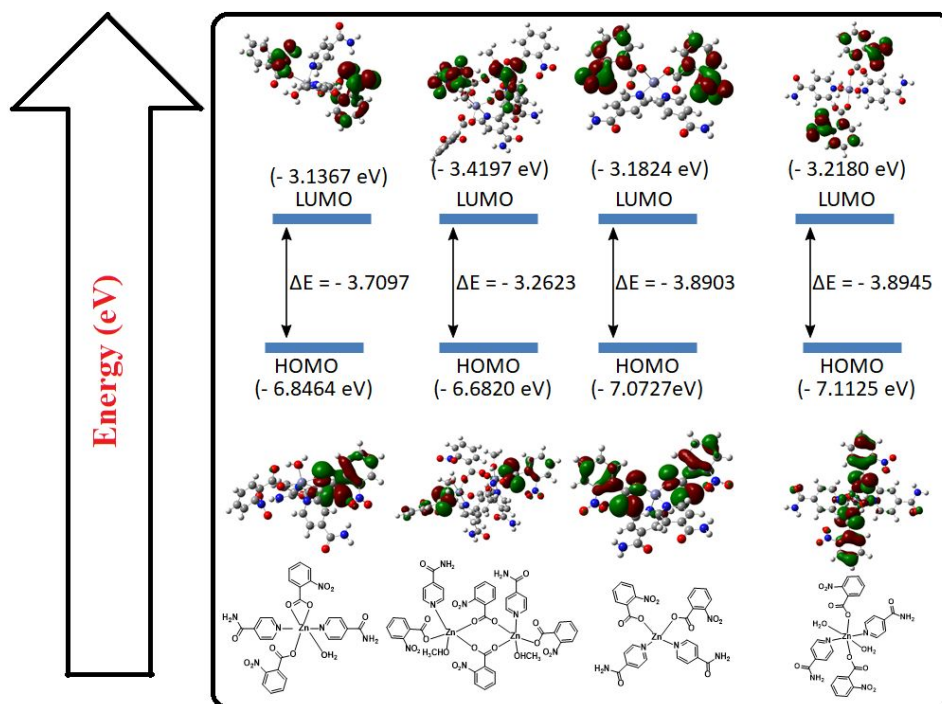

**Figure S25:** The HOMO and LUMO of zinc complexes having pyridine-4-carboxamide and 2-nitrobenzoate having different coordination, calculated by DFT using B3LYP function with LANL2DZ as basis set.

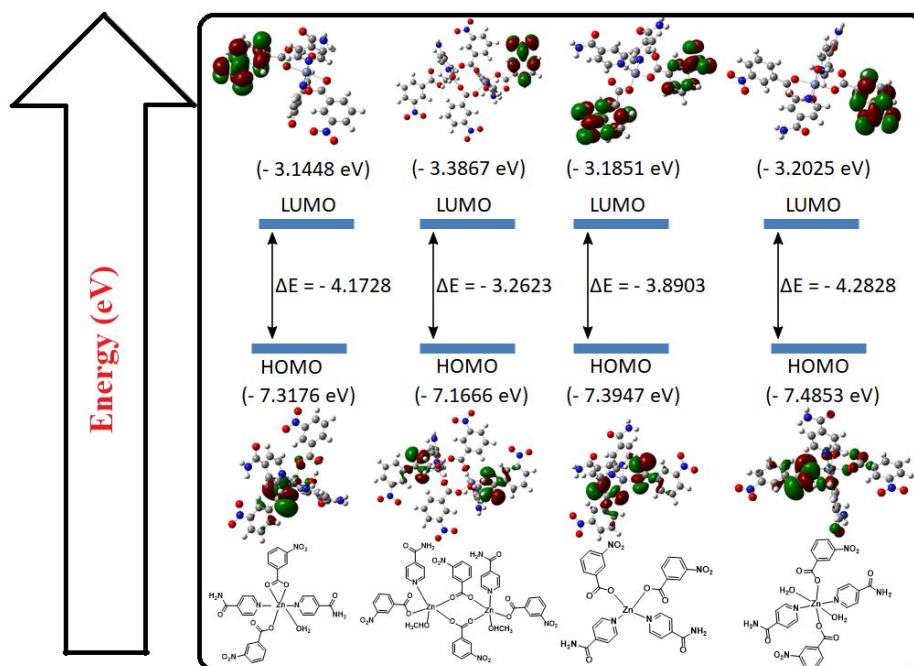

**Figure S26:** The HOMO and LUMO of different non-ionic zinc-complexes having pyridine-4-carboxamide and 3-nitrobenzoate, calculated by DFT using B3LYP function with LANL2DZ as basis set.

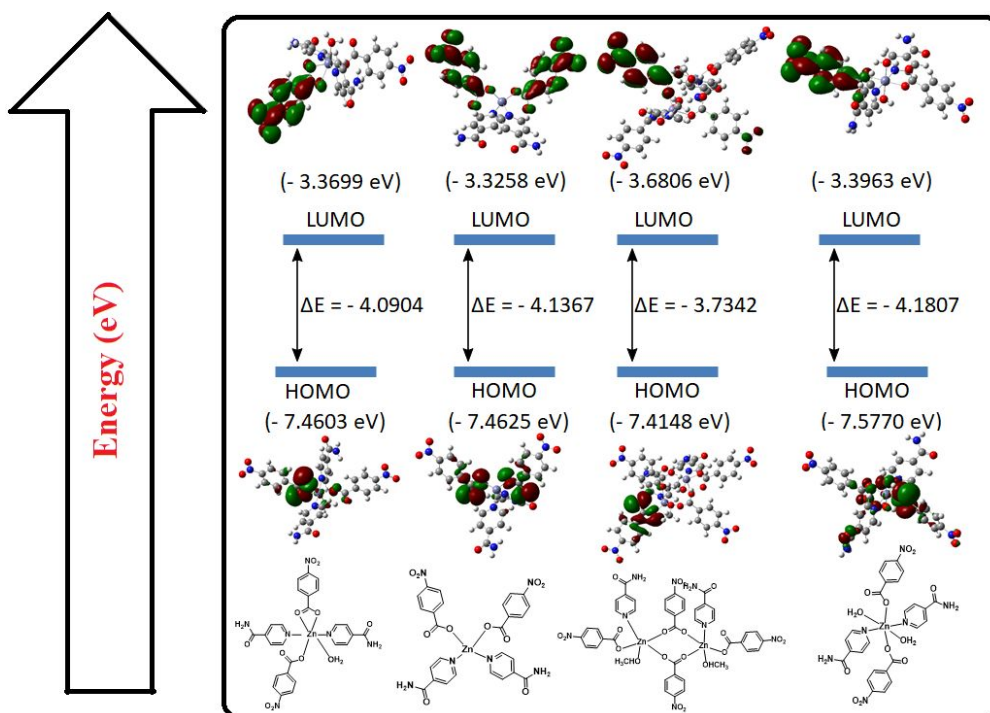

**Figure S27:** The HOMO and LUMO of different non-ionic zinc-complexes having pyridine-4-carboxamide and 4-nitrobenzoate complexes, calculated by DFT using B3LYP function with LANL2DZ as basis set.



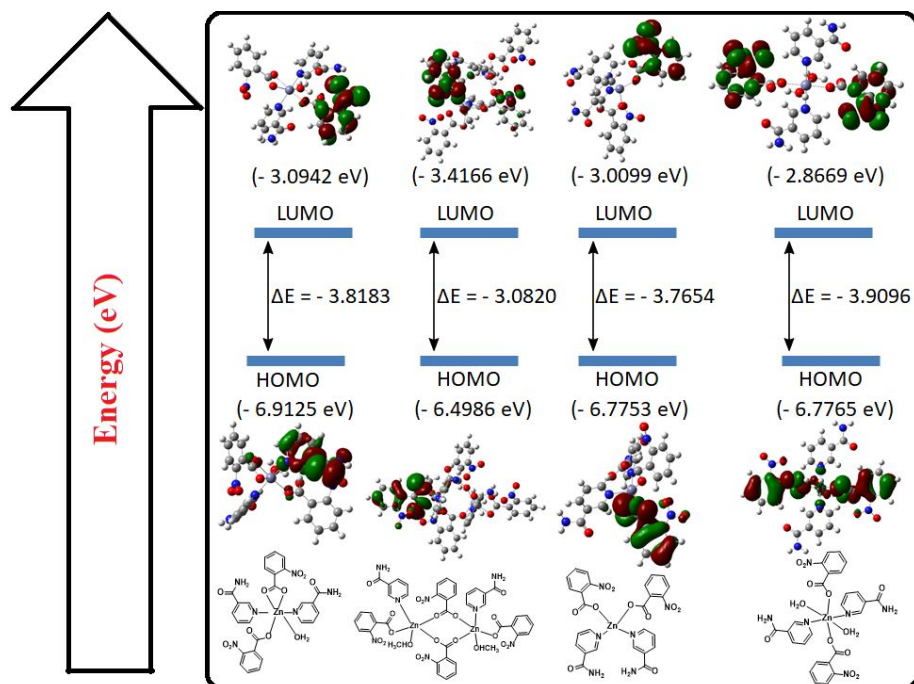

**Figure S28:** The HOMO and LUMO different non-ionic zinc-complexes having pyridine-3-carboxamide and 2-nitrobenzoate, calculated by DFT using B3LYP function with LANL2DZ as basis set.

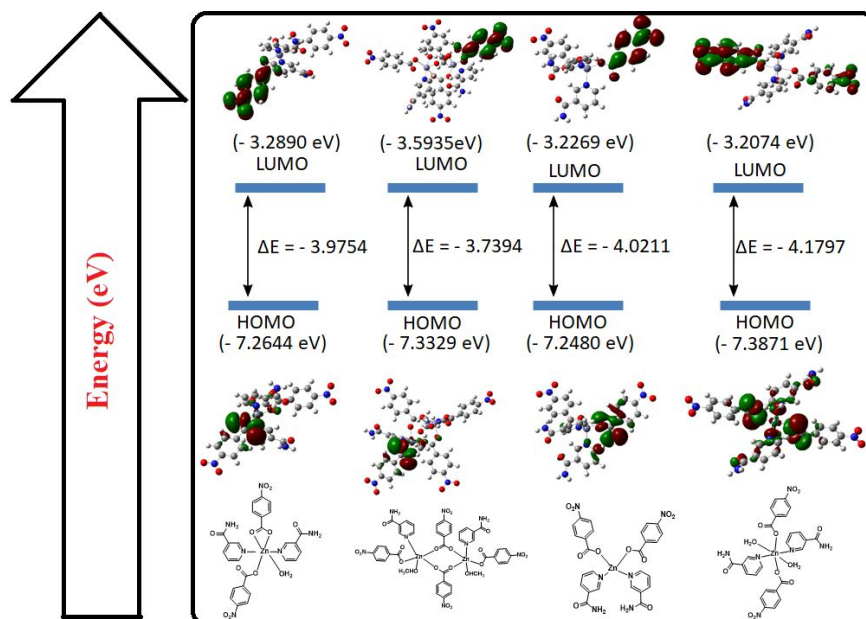

**Figure S29:** The HOMO and LUMO of different non-ionic zinc-complexes having pyridine-3-carboxamide 4-nitrobenzoate, calculated by DFT using B3LYP function with LANL2DZ as basis set.

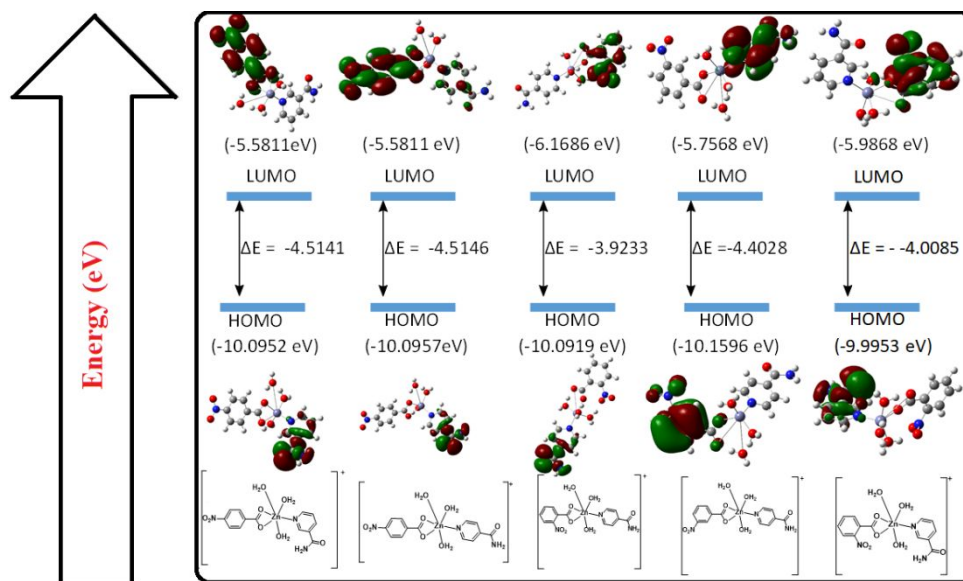

**Figure S30:** The HOMO and LUMO of different zinc-complexes having coordination of complex **5** (cationic form) from DFT calculation using B3LYP functional using LANL2DZ as basis set and +1 charge.

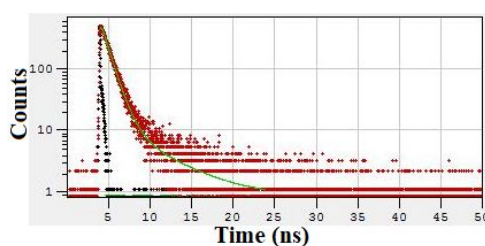

Goodness of fit  $\chi^2$ : 1.006

|   | $B_i$  | $\Delta B_i$ | $f_i$ (%) | $\Delta f_i$ (%) | $\tau_i$ (ns) | $\Delta \tau_i$ (ns) |
|---|--------|--------------|-----------|------------------|---------------|----------------------|
| 1 | 0.0917 | 0.0015       | 88.779    | 2.546            | 0.961         | 0.012                |
| 2 | 0.0023 | 0.0003       | 11.221    | 1.692            | 4.903         | 0.026                |

**Figure S31:** Time resolved fluorescence emission of complex **1** ( $10^{-4}$ M) in DMSO ( $\lambda_{\text{ex}} = 375$  nm,  $\lambda_{\text{em}} = 410$  nm).

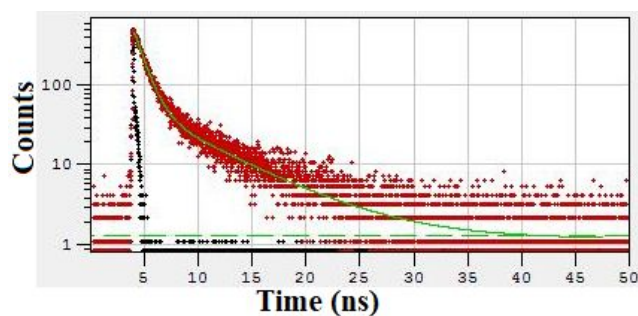

Goodness of fit  $\chi^2$ : 1.002

|   | $B_i$  | $\Delta B_i$ | $f_i$ (%) | $\Delta f_i$ (%) | $\tau_i$ (ns) | $\Delta\tau_i$ (ns) |
|---|--------|--------------|-----------|------------------|---------------|---------------------|
| 1 | 0.0929 | 0.0034       | 64.765    | 3.108            | 0.953         | 0.011               |
| 2 | 0.0077 | 0.0002       | 35.235    | 0.815            | 6.227         | 0.003               |

**Figure S32:** Time resolved fluorescence emission of complex **1** ( $10^{-4}$ M) in DMSO and 50 % water ( $\lambda_{\text{ex}} = 375$  nm,  $\lambda_{\text{em}} = 413$  nm).

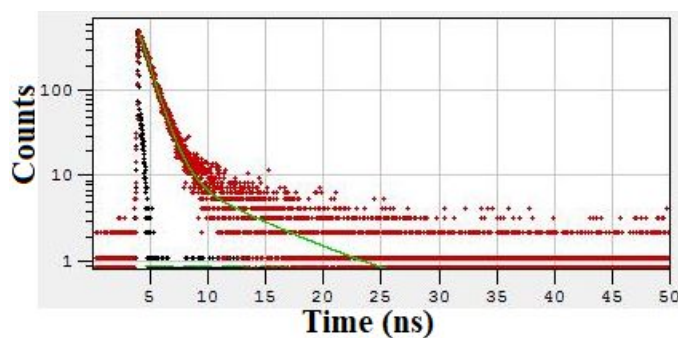

Goodness of fit  $\chi^2$ : 1.058

|   | $B_i$  | $\Delta B_i$ | $f_i$ (%) | $\Delta f_i$ (%) | $\tau_i$ (ns) | $\Delta\tau_i$ (ns) |
|---|--------|--------------|-----------|------------------|---------------|---------------------|
| 1 | 0.0894 | 0.0019       | 86.746    | 2.800            | 0.976         | 0.010               |
| 2 | 0.0019 | 0.0002       | 13.254    | 1.250            | 6.870         | 0.018               |

**Figure S33:** Time resolved fluorescence emission of complex **2** ( $10^{-4}$ M) in DMSO ( $\lambda_{\text{ex}} = 375$  nm,  $\lambda_{\text{em}} = 411$  nm).

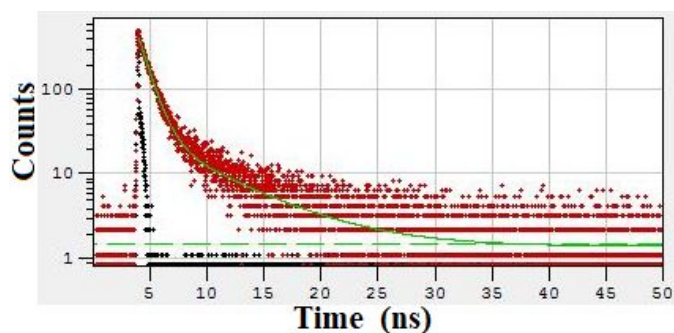

Goodness of fit  $\chi^2$ : 1.029

|   | $B_i$  | $\Delta B_i$ | $f_i$ (%) | $\Delta f_i$ (%) | $\tau_i$ (ns) | $\Delta\tau_i$ (ns) |
|---|--------|--------------|-----------|------------------|---------------|---------------------|
| 1 | 0.0888 | 0.0041       | 76.099    | 4.399            | 0.931         | 0.010               |
| 2 | 0.0044 | 0.0002       | 23.901    | 0.853            | 5.947         | 0.004               |

**Figure S34:** Time resolved fluorescence emission of solution of complex **2** ( $10^{-4}$ M) in DMSO and 50 % water ( $\lambda_{\text{ex}} = 375$  nm,  $\lambda_{\text{em}} = 414$  nm).

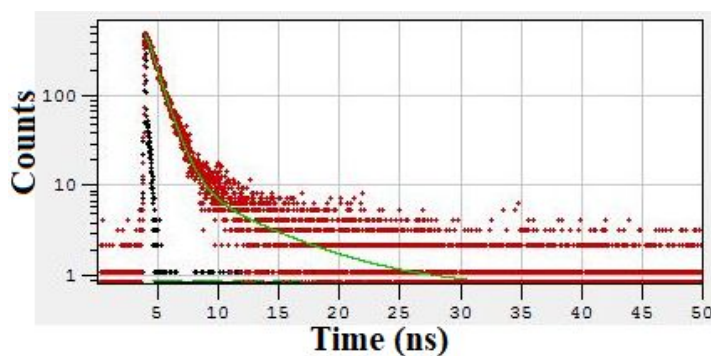

Goodness of fit  $\chi^2$ : 0.993

|   | $B_i$  | $\Delta B_i$ | $f_i$ (%) | $\Delta f_i$ (%) | $\tau_i$ (ns) | $\Delta\tau_i$ (ns) |
|---|--------|--------------|-----------|------------------|---------------|---------------------|
| 1 | 0.0954 | 0.0019       | 87.776    | 2.545            | 0.977         | 0.009               |
| 2 | 0.0021 | 0.0002       | 12.224    | 1.056            | 6.043         | 0.013               |

**Figure S35:** Time resolved fluorescence emission of solution of complex **3** ( $10^{-4}$ M) in DMSO ( $\lambda_{\text{ex}} = 375$  nm,  $\lambda_{\text{em}} = 411$  nm).

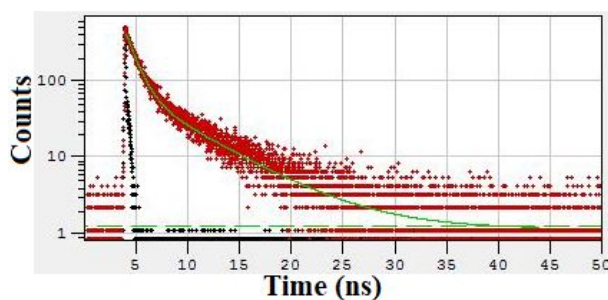

Goodness of fit  $\chi^2$ : 0.995

|   | $B_i$  | $\Delta B_i$ | $f_i$ (%) | $\Delta f_i$ (%) | $\tau_i$ (ns) | $\Delta \tau_i$ (ns) |
|---|--------|--------------|-----------|------------------|---------------|----------------------|
| 1 | 0.0754 | 0.0035       | 55.643    | 3.359            | 0.997         | 0.014                |
| 2 | 0.0108 | 0.0003       | 44.357    | 1.049            | 5.534         | 0.003                |

**Figure S36:** Time resolved fluorescence emission of solution of complex **3** ( $10^{-4}$ M) in DMSO and 50 % water ( $\lambda_{\text{ex}} = 375$  nm,  $\lambda_{\text{em}} = 412$  nm).

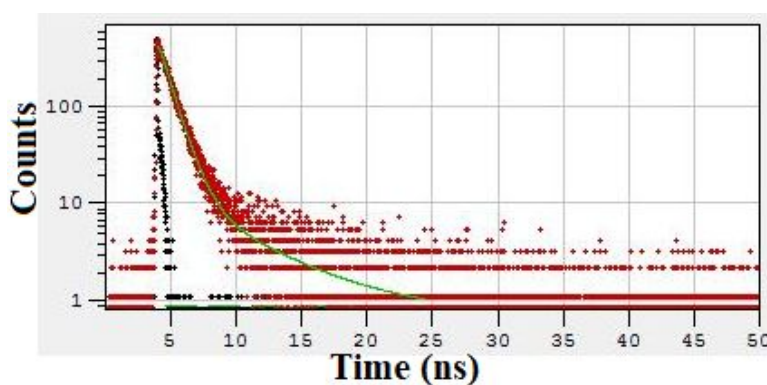

Goodness of fit  $\chi^2$ : 1.018

|   | $B_i$  | $\Delta B_i$ | $f_i$ (%) | $\Delta f_i$ (%) | $\tau_i$ (ns) | $\Delta \tau_i$ (ns) |
|---|--------|--------------|-----------|------------------|---------------|----------------------|
| 1 | 0.0832 | 0.0017       | 87.847    | 2.976            | 0.941         | 0.013                |
| 2 | 0.0020 | 0.0003       | 12.153    | 1.631            | 5.291         | 0.024                |

**Figure S37:** Time resolved fluorescence emission of solution mixture of complex **4** ( $10^{-4}$ M in HPLC DMSO) ( $\lambda_{\text{ex}} = 375$  nm,  $\lambda_{\text{em}} = 412$  nm).

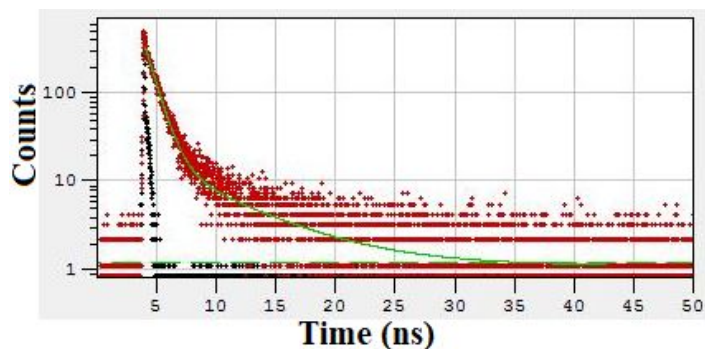

Goodness of fit  $\chi^2$ : 1.008

|   | $B_i$  | $\Delta B_i$ | $f_i$ (%) | $\Delta f_i$ (%) | $\tau_i$ (ns) | $\Delta \tau_i$ (ns) |
|---|--------|--------------|-----------|------------------|---------------|----------------------|
| 1 | 0.0802 | 0.0053       | 82.050    | 6.452            | 0.897         | 0.011                |
| 2 | 0.0026 | 0.0001       | 17.950    | 0.933            | 6.151         | 0.007                |

**Figure S38:** Time-resolved fluorescence emission of solution of complex **4** ( $10^{-4}$  M) DMSO and 50% water ( $\lambda_{\text{ex}} = 375$  nm,  $\lambda_{\text{em}} = 416$  nm).

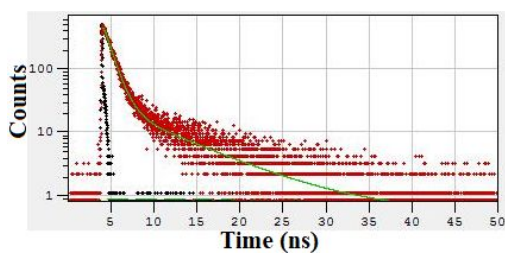

Goodness of fit  $\chi^2$ : 1.088

|   | $B_i$  | $\Delta B_i$ | $f_i$ (%) | $\Delta f_i$ (%) | $\tau_i$ (ns) | $\Delta \tau_i$ (ns) |
|---|--------|--------------|-----------|------------------|---------------|----------------------|
| 1 | 0.0842 | 0.0015       | 74.010    | 2.086            | 0.957         | 0.010                |
| 2 | 0.0039 | 0.0001       | 25.990    | 0.911            | 7.341         | 0.005                |

**Figure S39:** Time-resolved fluorescence emission of solution mixture of complex **5** ( $10^{-4}$  M in DMSO) ( $\lambda_{\text{ex}} = 375$  nm,  $\lambda_{\text{em}} = 412$  nm).

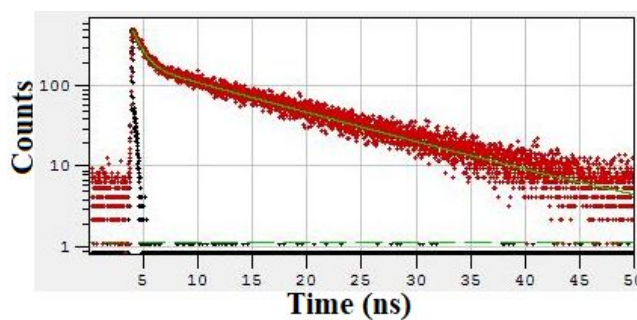

Goodness of fit  $\chi^2$ : 1.118

|   | $B_i$  | $\Delta B_i$ | $f_i$ (%) | $\Delta f_i$ (%) | $\tau_i$ (ns) | $\Delta\tau_i$ (ns) |
|---|--------|--------------|-----------|------------------|---------------|---------------------|
| 1 | 0.0683 | 0.0027       | 16.189    | 1.161            | 0.868         | 0.028               |
| 2 | 0.0263 | 0.0002       | 83.811    | 0.575            | 11.685        | 0.0007              |

Figure S40: Time resolved fluorescence emission of solution of complex **5** ( $10^{-4}$  M) in DMSO and 50% water ( $\lambda_{\text{ex}} = 375$  nm,  $\lambda_{\text{em}} = 417$  nm).

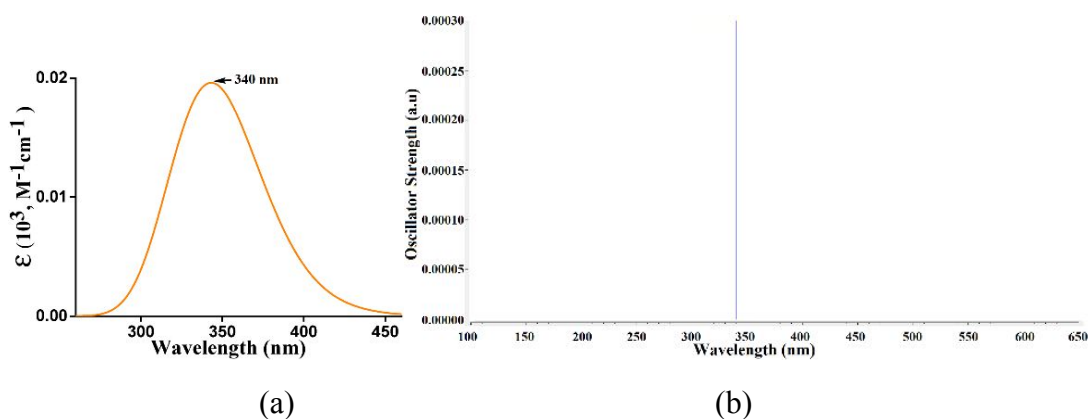

Figure S41: (a) Molar absorptivity  $\epsilon$  vs wavelength  $\lambda$  for complex **1**, (b) Oscillator strength vs wavelength  $\lambda$  for complex **1**, calculated by TD-DFT using B3LYP/LANL2DZ as basis set.

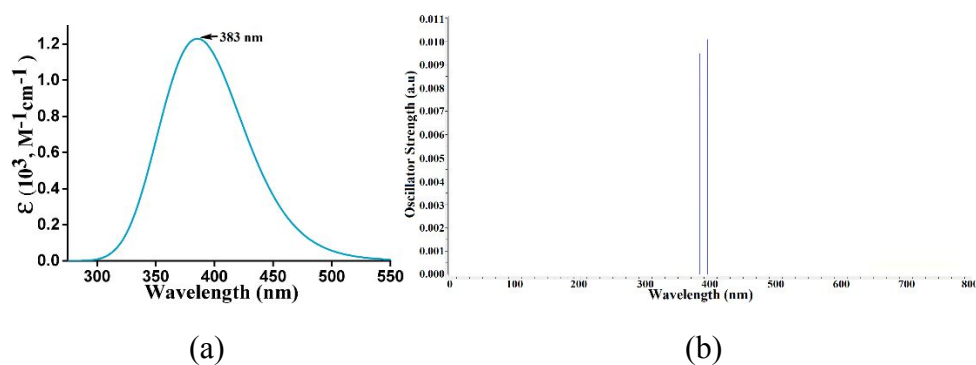

Figure S42: (a) Molar absorptivity  $\epsilon$  vs wavelength  $\lambda$  for complex **2**, (b) Oscillator strength vs wavelength  $\lambda$  for complex **2**, calculated by TD-DFT using B3LYP/LANL2DZ as basis set.

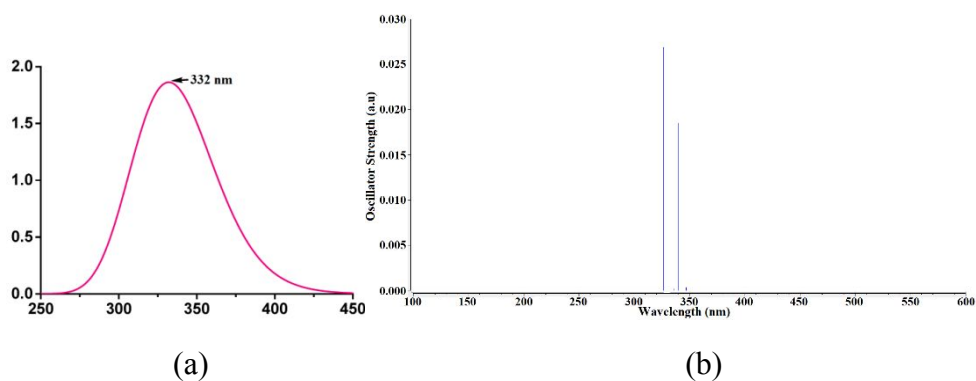

Figure S43: (a) Molar absorptivity  $\epsilon$  vs wavelength  $\lambda$  for complex **3**, (b) Oscillator strength vs wavelength  $\lambda$  for complex **3**, calculated by TD-DFT using B3LYP/LANL2DZ as basis set.

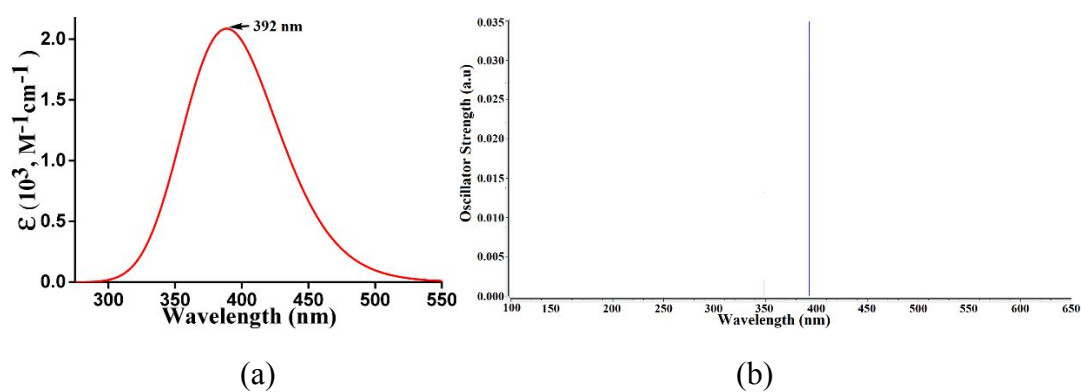

Figure S44: (a) Molar absorptivity  $\epsilon$  vs wavelength  $\lambda$  for complex **4**, (b) Oscillator strength vs wavelength  $\lambda$  for complex **4**, calculated by TD-DFT using B3LYP/LANL2DZ as basis set.

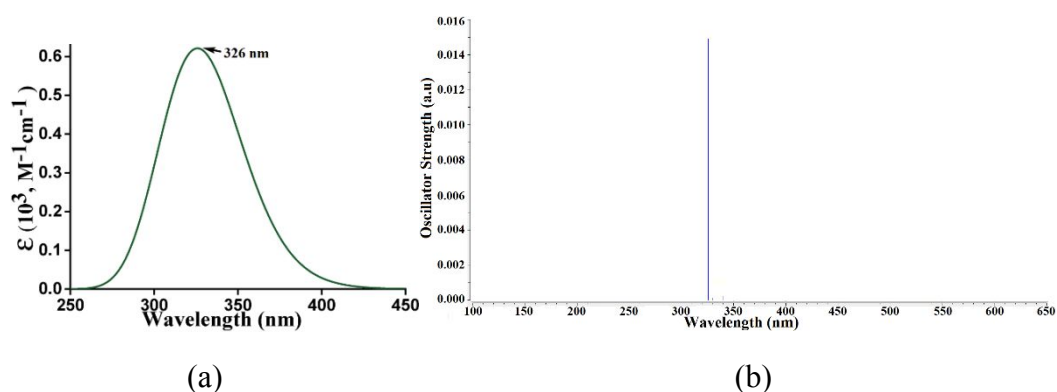

Figure S45: (a) Molar absorptivity  $\epsilon$  vs wavelength  $\lambda$  for complex **5**, (b) Oscillator strength vs wavelength  $\lambda$  for complex **5**, calculated by TD-DFT using B3LYP/LANL2DZ as basis set.



**Table S3:** Hydrogen bond parameters of zinc-complexes **1-5**.

| Complex                    | D-H...A                                | $d_{D-H}$ (Å) | $d_{H...A}$ (Å) | $d_{D...A}$ (Å) | $\angle D-H...A$ (°) |
|----------------------------|----------------------------------------|---------------|-----------------|-----------------|----------------------|
| <b>Complex 1</b>           | N(2)-H(2R) ... O(3) [1/2+x,-1/2+y,z]   | 0.82 (4)      | 2.26 (4)        | 3.026 (4)       | 155 (3)              |
|                            | N(2)-H(2S) ... O(6) [x,y,z]            | 0.86 (4)      | 2.02 (4)        | 2.871 (4)       | 169 (4)              |
|                            | O(6)-H(6) ... O(1) [x, 1+y, z]         | 0.82          | 1.92            | 2.735 (4)       | 170                  |
|                            | C(4)-H(4) ... O(6) [x, y,z]            | 0.93          | 2.58            | 3.375 (4)       | 144                  |
| <b>Complex 2</b>           | N(2)-H(2A) ... O(9) [1-x, 2-y, 1-z]    | 0.86          | 2.28            | 3.115(6)        | 164                  |
|                            | N(2)-H(2B) ... O(7) [-x, 2-y, 1-z]     | 0.86          | 2.06            | 2.864 (4)       | 154                  |
|                            | N(4)-H(4R) ... O(3) [-1+x,y,z]         | 0.80 (5)      | 2.43 (6)        | 3.106 (5)       | 144                  |
|                            | N(4)-H(4S) ... O(2) [-1-x,1-y,-z]      | 0.92 (5)      | 1.95 (5)        | 2.853 (6)       | 168 (4)              |
|                            | O(11)-H(11R)...O(1) [-1+x,y,z]         | 0.79 (6)      | 1.93 (6)        | 2.715 (5)       | 173 (6)              |
|                            | O(11)-H(11S)...O(4) [-x,1-y,1-z]       | 0.83 (6)      | 1.89 (6)        | 2.707 (5)       | 170 (5)              |
|                            | C(4)-H(4)...O(11) [1+x,y,z]            | 0.93          | 2.43            | 3.283 (6)       | 152                  |
|                            | C(5)-H(5)...O(3) [x,y,z]               | 0.93          | 2.47            | 3.038 (5)       | 119                  |
|                            | C(11)-H(11A)...O(3) [x,y,z]            | 0.93          | 2.48            | 3.074 (5)       | 122                  |
|                            | C(11)-H(11A)...O(5) [x,y,z]            | 0.93          | 2.48            | 3.255 (5)       | 140                  |
| <b>Complex 3</b>           | N(4)-H(4A) ... O(5) [1-x,1-y,1-z]      | 0.86 (3)      | 2.17 (3)        | 3.001 (3)       | 162 (3)              |
|                            | N(4)-H(4B) ... O(8) [1/2+x,1/2+y,z]    | 0.85 (3)      | 2.42 (4)        | 3.131 (4)       | 142 (3)              |
|                            | O(9)-H(9R) ... O(5) [1-x, -y, 1-z]     | 0.83 (3)      | 1.88 (4)        | 2.678 (3)       | 161 (4)              |
|                            | C(15)-H(15) ... O(2) [1-x, y,1/2-z]    | 0.93          | 2.59            | 3.126 (3)       | 117                  |
| <b>Complex 4</b>           | N(3)-H(3A) ... O(6) [-1-x,-y,-z]       | 0.86          | 2.03            | 2.863(2)        | 162                  |
|                            | N(3)-H(3B)...O(2) [x,y,1+z]            | 0.86          | 2.18            | 2.989 (2)       | 156                  |
|                            | O(5)-H(5R) ... O(7) [-1+x,y,z]         | 0.83 (2)      | 1.97 (2)        | 2.804 (2)       | 177.1(19)            |
|                            | O(5)-H(5S)...O(2) [x,y,z]              | 0.82          | 1.93            | 2.651(2)        | 145                  |
|                            | O(7)-H(7R)...O(6) [1+x,y,z]            | 0.84 (2)      | 2.07 (2)        | 2.887 (2)       | 163 (2)              |
|                            | O(7)-H(7S)...O(1) [x,y,z]              | 0.84 (2)      | 2.09 (2)        | 2.927 (2)       | 178 (3)              |
|                            | C(4)-H(4)...O(7) [-1/2+x,1/2-y,-1/2+z] | 0.93          | 2.54            | 3.380 (3)       | 151                  |
|                            | C(9)-H(9)...O(3) [1/2+x,1/2-y,1/2+z]   | 0.93          | 2.55            | 3.226 (3)       | 130                  |
|                            | C(12)-H(12)...O(6) [x,y,z]             | 0.93          | 2.39            | 2.735 (2)       | 102                  |
|                            | C(12)-H(12)...O(1) [-x,-y,-z]          | 0.93          | 2.46            | 3.040 (2)       | 121                  |
| <b>Complex 5</b>           | O(1)-H(1R)...O(10) [x,y,z]             | 0.82          | 1.84            | 2.618 (5)       | 158                  |
|                            | O(1)-H(1S)...O(9) [1+x,y,z]            | 0.73 (7)      | 2.07 (7)        | 2.780 (5)       | 166 (6)              |
|                            | O(2)-H(2R) ... O(1) [x,y,z]            | 0.82          | 2.58            | 2.853(5)        | 101                  |
|                            | O(2)-H(2R)...O(9) [x,y,z]              | 0.82          | 1.89            | 2.643 (4)       | 152                  |
|                            | O(2)-H(2S)...O(5) [-1+x,y,z]           | 0.85 (4)      | 1.98 (4)        | 2.789 (4)       | 160 (4)              |
|                            | N(3)-H(3F)...O(4) [1+x,-1+y,z]         | 0.84 (6)      | 2.10 (6)        | 2.925(6)        | 167 (6)              |
|                            | N(3)-H(3G)...O(9) [1+x,y,z]            | 0.89 (5)      | 2.29 (5)        | 3.165 (5)       | 168 (5)              |
|                            | O(3)-H(3R)...O(8) [-1+x,y,z]           | 0.82          | 1.97            | 2.789 (5)       | 178                  |
|                            | O(3)-H(3S)...O(6) [2-x,1-y,-z]         | 0.85 (3)      | 2.15 (4)        | 2.949 (6)       | 158 (5)              |
|                            | C(4)-H(4)...O(7) [2-x,2-y,-z]          | 0.93          | 2.48            | 3.319 (10)      | 151                  |
|                            | C(8)-H(8)...O(12) [-x,1-y,1-z]         | 0.93          | 2.59            | 3.473 (7)       | 158                  |
|                            | C(10)-H(10)...O(9) [1+x, -1+y,z]       | 0.93          | 2.53            | 3.426 (6)       | 163                  |
|                            | C(12)-H(12)...O(5) [x,y,z]             | 0.93          | 2.55            | 3.139 (6)       | 122                  |
|                            | C(12)-H(12)...O(8) [x,y,z]             | 0.93          | 2.47            | 2.799 (6)       | 101                  |
| C(16)-H(16)...O(9) [x,y,z] | 0.93                                   | 2.50          | 2.814 (6)       | 100             |                      |
